# Supplementary material for: Convalescent plasma use in the USA was inversely correlated with COVID-19 mortality
Source: eLife. 2021 Jun 4;10:e69866. doi: 10.7554/eLife.69866 (PMC8205484; doi:10.7554/eLife.69866)
Supplement: Figure 1—source data 1. [file elife-69866-fig1-data1.csv]

EndWeek	StartWeek	Doses	Cases	Deaths	Admissions
2020-03-29	2020-03-22	7	109014	2976	NA
2020-04-05	2020-03-30	63	207447	9202	NA
2020-04-12	2020-04-06	422	220081	14901	NA
2020-04-19	2020-04-13	1405	198244	15254	NA
2020-04-26	2020-04-20	4133	207398	14958	NA
2020-05-03	2020-04-27	4994	190511	13173	NA
2020-05-10	2020-05-04	4964	171429	12068	NA
2020-05-17	2020-05-11	4416	156714	9855	NA
2020-05-24	2020-05-18	3942	156695	8315	NA
2020-05-31	2020-05-25	3729	146287	6538	NA
2020-06-07	2020-06-01	3285	144908	5772	NA
2020-06-14	2020-06-08	3200	149286	5027	NA
2020-06-21	2020-06-15	4242	188059	4142	NA
2020-06-28	2020-06-22	5649	273490	3881	NA
2020-07-05	2020-06-29	6638	343971	3659	NA
2020-07-12	2020-07-06	7316	412880	5397	NA
2020-07-19	2020-07-13	11231	466142	5561	21481
2020-07-26	2020-07-20	12919	458720	6513	33430
2020-08-02	2020-07-27	11724	432976	7856	38260
2020-08-09	2020-08-03	10511	377311	7421	33160
2020-08-16	2020-08-10	10495	354444	7126	31542
2020-08-23	2020-08-17	9218	298989	6711	30231
2020-08-30	2020-08-24	8968	291489	6309	29785
2020-09-06	2020-08-31	8424	287211	5855	27016
2020-09-13	2020-09-07	7894	244208	5125	28356
2020-09-20	2020-09-14	9647	287932	5348	23928
2020-09-27	2020-09-21	11670	308532	5439	24871
2020-10-04	2020-09-28	11101	300980	4939	27575
2020-10-11	2020-10-05	14796	351559	5173	33657
2020-10-18	2020-10-12	16401	393976	5222	37037
2020-10-25	2020-10-19	17827	496128	5813	40946
2020-11-01	2020-10-26	18628	608554	6012	46486
2020-11-08	2020-11-02	19205	816909	7303	56896
2020-11-15	2020-11-09	26176	1056904	8157	71028
2020-11-22	2020-11-16	28076	1215935	11119	81845
2020-11-29	2020-11-23	28688	1149529	10816	86872
2020-12-06	2020-11-30	27350	1404294	16037	94603
2020-12-13	2020-12-07	25706	1518655	17907	101653
2020-12-20	2020-12-14	29842	1521865	19247	104999
2020-12-27	2020-12-21	24350	1300367	16368	106345
2021-01-03	2020-12-28	25475	1506803	18906	112345
2021-01-10	2021-01-04	30576	1722175	23108	116391
2021-01-17	2021-01-11	28946	1530089	23766	108755
2021-01-24	2021-01-18	25395	1189490	21906	93990
2021-01-31	2021-01-25	20226	1042851	22208	80607
2021-02-07	2021-02-01	18913	824077	20737	69087
2021-02-14	2021-02-08	12303	638553	17417	55620
2021-02-21	2021-02-15	8369	464787	13228	46438
2021-02-28	2021-02-22	8429	473248	13780	41730
2021-03-07	2021-03-01	6006	416727	11881	35545
2021-03-14	2021-03-08	3905	375719	9564	33655
