# Supplementary material for: Convalescent plasma use in the USA was inversely correlated with COVID-19 mortality
Source: eLife. 2021 Jun 4;10:e69866. doi: 10.7554/eLife.69866 (PMC8205484; doi:10.7554/eLife.69866)
Supplement: Figure 2—source data 1. [file elife-69866-fig2-data1.csv]

Date	Type	Value
2020-07-26	DosesPer	0.3864492970385881
2020-08-02	DosesPer	0.30642969158389965
2020-08-09	DosesPer	0.316978287092883
2020-08-16	DosesPer	0.3327309618920804
2020-08-23	DosesPer	0.30491879196850913
2020-08-30	DosesPer	0.3010911532650663
2020-09-06	DosesPer	0.3118152206100089
2020-09-13	DosesPer	0.2783890534631119
2020-09-20	DosesPer	0.4031678368438649
2020-09-27	DosesPer	0.4692211812954847
2020-10-04	DosesPer	0.4025747960108794
2020-10-11	DosesPer	0.43961137356270613
2020-10-18	DosesPer	0.44282744282744285
2020-10-25	DosesPer	0.43537830313095294
2020-11-01	DosesPer	0.40072279826184226
2020-11-08	DosesPer	0.3375456974128234
2020-11-15	DosesPer	0.3685307202793265
2020-11-22	DosesPer	0.343038670657951
2020-11-29	DosesPer	0.3302329864628419
2020-12-06	DosesPer	0.28910288257243427
2020-12-13	DosesPer	0.25287989533019195
2020-12-20	DosesPer	0.2842122305926723
2020-12-27	DosesPer	0.22897174291221967
2021-01-03	DosesPer	0.22675686501401932
2021-01-10	DosesPer	0.2627007242828054
2021-01-17	DosesPer	0.2661578777987219
2021-01-24	DosesPer	0.2701883179061602
2021-01-31	DosesPer	0.2509211358814991
2021-02-07	DosesPer	0.27375627831574684
2021-02-14	DosesPer	0.22119741100323626
2021-02-21	DosesPer	0.18021878633877428
2021-02-28	DosesPer	0.2019889767553319
2021-03-07	DosesPer	0.16896891264594177
2021-03-14	DosesPer	0.11603030753231318
2020-07-26	Mortality2	0.2219862399042776
2020-08-02	Mortality2	0.18625196027182436
2020-08-09	Mortality2	0.20238238841978287
2020-08-16	Mortality2	0.20001902225603957
2020-08-23	Mortality2	0.19367536634580398
2020-08-30	Mortality2	0.1720664764143025
2020-09-06	Mortality2	0.19795676636067516
2020-09-13	Mortality2	0.19181125687685147
2020-09-20	Mortality2	0.20641089936476095
2020-09-27	Mortality2	0.20799324514494794
2020-10-04	Mortality2	0.18937443336355395
2020-10-11	Mortality2	0.1727129571857266
2020-10-18	Mortality2	0.16232416232416233
2020-10-25	Mortality2	0.17835686025496997
2020-11-01	Mortality2	0.1754721851740309
2020-11-08	Mortality2	0.1954267435320585
2020-11-15	Mortality2	0.15227797488314468
2020-11-22	Mortality2	0.19594355183578716
2020-11-29	Mortality2	0.20613085919513768
2020-12-06	Mortality2	0.2034502077101149
2020-12-13	Mortality2	0.16101836640335257
2020-12-20	Mortality2	0.1800588577034067
2020-12-27	Mortality2	0.2172927735201467
2021-01-03	Mortality2	0.2115447950509591
2021-01-10	Mortality2	0.1882104286413898
2021-01-17	Mortality2	0.20420210565031494
2021-01-24	Mortality2	0.22062985423981274
2021-01-31	Mortality2	0.21607304576525613
2021-02-07	Mortality2	0.19146872783591704
2021-02-14	Mortality2	0.24775260697590795
2021-02-21	Mortality2	0.2558465050174426
2021-02-28	Mortality2	0.22918763479511142
2021-03-07	Mortality2	NA
2021-03-14	Mortality2	NA
