# Supplementary material for: Convalescent plasma use in the USA was inversely correlated with COVID-19 mortality
Source: eLife. 2021 Jun 4;10:e69866. doi: 10.7554/eLife.69866 (PMC8205484; doi:10.7554/eLife.69866)
Supplement: Figure 3—figure supplement 1—source data 1. [file elife-69866-fig3-figsupp1-data1.csv]

Shift	Type	Value
0	Adjusted R Squared	0.7132314972602503
1	Adjusted R Squared	0.8680892187813578
2	Adjusted R Squared	0.9536816036793823
3	Adjusted R Squared	0.9600059445481745
4	Adjusted R Squared	0.8845115169824651
5	Adjusted R Squared	0.7462983423337848
6	Adjusted R Squared	0.6035950455657539
7	Adjusted R Squared	0.4904774110688177
8	Adjusted R Squared	0.3916284376532799
9	Adjusted R Squared	0.2688402458581075
10	Adjusted R Squared	0.1476834243524292
0	Pearson Correlation	0.8499894670658118
1	Pearson Correlation	0.9340697216064652
2	Pearson Correlation	0.9773836451258039
3	Pearson Correlation	0.9805275639529232
4	Pearson Correlation	0.9427559961121099
5	Pearson Correlation	0.8695148638165251
6	Pearson Correlation	0.7870522496906568
7	Pearson Correlation	0.7153373462506696
8	Pearson Correlation	0.6465905776815927
9	Pearson Correlation	0.5496133005461973
10	Pearson Correlation	0.43390082732658436
0	Pearson P Value	7.492690586263479e-10
1	Pearson P Value	1.6794615084704923e-14
2	Pearson P Value	1.9540404853978356e-20
3	Pearson P Value	1.270267331112067e-20
4	Pearson P Value	6.51456453883963e-14
5	Pearson P Value	3.9393216394352224e-9
6	Pearson P Value	1.8470383501784631e-6
7	Pearson P Value	5.83902861530056e-5
8	Pearson P Value	6.400076276849975e-4
9	Pearson P Value	0.00659439837589272
10	Pearson P Value	0.04363580332822267
