# Supplementary material for: Convalescent plasma use in the USA was inversely correlated with COVID-19 mortality
Source: eLife. 2021 Jun 4;10:e69866. doi: 10.7554/eLife.69866 (PMC8205484; doi:10.7554/eLife.69866)
Supplement: Figure 3—figure supplement 2—source data 2. [file elife-69866-fig3-figsupp2-data2.csv]

x	y
Quintile 1 12-24%	0.223
Quintile 2 25-28%	0.20600000000000002
Quintile 3 29-32%	0.2
Quintile 4 33-40%	0.2
Quintile 5 41-52%	0.18
