# Supplementary material for: Convalescent plasma use in the USA was inversely correlated with COVID-19 mortality
Source: eLife. 2021 Jun 4;10:e69866. doi: 10.7554/eLife.69866 (PMC8205484; doi:10.7554/eLife.69866)
Supplement: Figure 3—figure supplement 3—source data 3. [file elife-69866-fig3-figsupp3-data3.csv]

EndWeek	StartWeek	Doses	Cases	Deaths	Admissions	DosesPer	Mortality	Mortality2	X65..YR
2020-07-26	2020-07-20	12919	458720	6513	33430	0.3864492970385881	0.19482500747831288	0.2219862399042776	36.9
2020-08-02	2020-07-27	11724	432976	7856	38260	0.30642969158389965	0.20533193936225824	0.18625196027182436	37.2
2020-08-09	2020-08-03	10511	377311	7421	33160	0.316978287092883	0.22379372738238842	0.20238238841978287	37.4
2020-08-16	2020-08-10	10495	354444	7126	31542	0.3327309618920804	0.22592099422991566	0.20001902225603957	36.5
2020-08-23	2020-08-17	9218	298989	6711	30231	0.30491879196850913	0.2219906718269326	0.19367536634580398	38.6
2020-08-30	2020-08-24	8968	291489	6309	29785	0.3010911532650663	0.21181802920933357	0.1720664764143025	38
2020-09-06	2020-08-31	8424	287211	5855	27016	0.3118152206100089	0.21672342315664792	0.19795676636067516	39.3
2020-09-13	2020-09-07	7894	244208	5125	28356	0.2783890534631119	0.18073776273099168	0.19181125687685147	38.8
2020-09-20	2020-09-14	9647	287932	5348	23928	0.4031678368438649	0.22350384486793715	0.20641089936476095	41.3
2020-09-27	2020-09-21	11670	308532	5439	24871	0.4692211812954847	0.21868843231072332	0.20799324514494794	40.9
2020-10-04	2020-09-28	11101	300980	4939	27575	0.4025747960108794	0.17911151405258385	0.18937443336355395	41.2
2020-10-11	2020-10-05	14796	351559	5173	33657	0.43961137356270613	0.15369759633954302	0.1727129571857266	44.1
2020-10-18	2020-10-12	16401	393976	5222	37037	0.44282744282744285	0.14099414099414098	0.16232416232416233	44.2
2020-10-25	2020-10-19	17827	496128	5813	40946	0.43537830313095294	0.14196746934987545	0.17835686025496997	44.3
2020-11-01	2020-10-26	18628	608554	6012	46486	0.40072279826184226	0.1293292604224928	0.1754721851740309	46.8
2020-11-08	2020-11-02	19205	816909	7303	56896	0.3375456974128234	0.1283570022497188	0.1954267435320585	46.4
2020-11-15	2020-11-09	26176	1056904	8157	71028	0.3685307202793265	0.11484203412738639	0.15227797488314468	49.1
2020-11-22	2020-11-16	28076	1215935	11119	81845	0.343038670657951	0.13585435884904393	0.19594355183578716	51.5
2020-11-29	2020-11-23	28688	1149529	10816	86872	0.3302329864628419	0.12450501887834975	0.20613085919513768	51.9
2020-12-06	2020-11-30	27350	1404294	16037	94603	0.28910288257243427	0.16951893703159518	0.2034502077101149	51.9
2020-12-13	2020-12-07	25706	1518655	17907	101653	0.25287989533019195	0.17615810649956223	0.16101836640335257	51.4
2020-12-20	2020-12-14	29842	1521865	19247	104999	0.2842122305926723	0.18330650768102552	0.1800588577034067	52.5
2020-12-27	2020-12-21	24350	1300367	16368	106345	0.22897174291221967	0.15391414735060416	0.2172927735201467	53.2
2021-01-03	2020-12-28	25475	1506803	18906	112345	0.22675686501401932	0.16828519293248476	0.2115447950509591	51.4
2021-01-10	2021-01-04	30576	1722175	23108	116391	0.2627007242828054	0.19853768762189516	0.1882104286413898	50.4
2021-01-17	2021-01-11	28946	1530089	23766	108755	0.2661578777987219	0.2185278837754586	0.20420210565031494	50.1
2021-01-24	2021-01-18	25395	1189490	21906	93990	0.2701883179061602	0.23306734759016917	0.22062985423981274	49.8
2021-01-31	2021-01-25	20226	1042851	22208	80607	0.2509211358814991	0.2755095711290583	0.21607304576525613	50.3
2021-02-07	2021-02-01	18913	824077	20737	69087	0.27375627831574684	0.3001577720844732	0.19146872783591704	45.4
2021-02-14	2021-02-08	12303	638553	17417	55620	0.22119741100323626	0.3131427544048903	0.24775260697590795	45.2
2021-02-21	2021-02-15	8369	464787	13228	46438	0.18021878633877428	0.2848529221758043	0.2558465050174426	42.9
