# Supplementary material for: Convalescent plasma use in the USA was inversely correlated with COVID-19 mortality
Source: eLife. 2021 Jun 4;10:e69866. doi: 10.7554/eLife.69866 (PMC8205484; doi:10.7554/eLife.69866)
Supplement: Figure 4—figure supplement 1—source data 1. [file elife-69866-fig4-figsupp1-data1.csv]

WeekEndDate	Admissions	ObservedDeaths	Maintenance	MainHi	MainLo	X50.	X50.Hi	X50.Lo	None	NoneHi	NoneLo
2020-07-19	21481	7856	3886.3992697692365	4181.002945889312	3591.7955936491603	3632.092304336201	4072.71788083281	3191.4667278395923	5348.063731009856	6070.185914299504	4625.941547720209
2020-07-26	54911	15277	9934.643187109472	10687.726491398353	9181.559882820588	9284.568712974495	10410.921817159835	8158.215608789156	13671.036149782703	15516.967494069178	11825.104805496225
2020-08-02	93171	22403	16856.74346462779	18134.54799457442	15578.938934681155	15753.72059435353	17664.875828642696	13842.565360064367	23196.519988916687	26328.62957130483	20064.410406528543
2020-08-09	126331	29114	22856.138268666142	24588.7194803381	21123.557056994185	21360.54433681377	23951.888766979642	18769.1999066479	31452.27127238984	35699.113483514295	27205.429061265386
2020-08-16	157873	35423	28562.800238176933	30727.96788214624	26397.63259420762	26693.790250103302	29932.134909953827	23455.44559025278	39305.19367840041	44612.376558270356	33998.01079853045
2020-08-23	188104	41278	34032.27262421081	36612.0468383019	31452.498410119715	31805.367106506063	35663.82031824286	27946.91389476927	46831.7201274558	53155.1720694285	40508.26818548309
2020-08-30	217889	46403	39421.05351197566	42409.31757724856	36432.78944670275	36841.532521740635	41310.945781703835	32372.11926177743	54247.207219682816	61571.93513713535	46922.479302230284
2020-09-06	244905	51751	44308.85960443345	47667.63774791779	40950.0814609491	41409.50448272694	46433.07912133324	36385.929844120634	60973.30422433634	69206.22323641916	52740.38521225352
2020-09-13	273261	57190	49439.10203698205	53186.77184473066	45691.432229233425	46204.04893511543	51809.271488024504	40598.82638220636	68033.01723381055	77219.17383396474	58846.86063365635
2020-09-20	297189	62129	53768.219011379806	57844.05216171961	49692.38586104	50249.88966218385	56345.93148767851	44153.847836689194	73990.30362436983	83980.84268352289	63999.76456521676
2020-09-27	322060	67302	58267.94603705043	62684.87541330068	53851.016660800175	54455.176552977835	61061.38078772007	47848.97231823561	80182.36605414248	91008.98820163391	69355.74390665103
2020-10-04	349635	72524	63256.88788630729	68051.99781136864	58461.77796124594	59117.666441347596	66289.49845281782	51945.834429877374	87047.63570558313	98801.24073116275	75294.03068000352
2020-10-11	383292	78337	69346.20124334948	74602.90401451544	64089.498472183506	64808.524906365215	72670.74074671428	56946.309066016154	95427.12367144127	108312.16886847377	82542.07847440876
2020-10-18	420329	84349	76047.03312987446	81811.68415077086	70282.38210897807	71070.88711835255	79692.81849693097	62448.95573977413	104648.12066438443	118778.23077005707	90518.01055871179
2020-10-25	461275	91652	83455.09162342556	89781.30132978411	77128.881917067	77994.19848622881	87456.02814027068	68532.36883218696	114842.33031616645	130348.91334753984	99335.74728479305
2020-11-01	507761	99809	91865.4615528745	98829.20891986886	84901.71418588013	85854.23493049922	96269.60122385123	75438.86863714721	126415.81807743102	143485.11102977654	109346.52512508548
2020-11-08	564657	110928	102159.23618407373	109903.29036902479	94415.18199912267	95474.43528185681	107056.87167438256	83891.99888933107	140581.05405525034	159563.00767239023	121599.10043811044
2020-11-15	635685	121744	115009.80959002174	123727.9855527046	106291.63362733887	107484.1299977635	120523.51687897234	94444.74311655469	158264.69404808903	179634.38075189607	136895.007344282
2020-11-22	717530	137781	129817.42321295656	139658.07195959025	119976.7744663229	121322.80578792209	136041.02514007568	106604.58643576848	178641.41189476757	202762.46446102706	154520.3593285081
2020-11-29	804402	155688	145534.53495651568	156566.59986403122	134502.47004900014	136011.4665887365	152511.63394523878	119511.29923223425	200269.68769385925	227311.0977065476	173228.2776811709
2020-12-06	899005	174935	162650.3596442853	174979.86841251436	150320.8508760562	152007.3153977825	170448.0116595177	133566.61913604732	223822.7286670321	254044.38749987548	193601.06983418867
2020-12-13	1000658	191303	181041.68895715955	194765.3296321264	167318.0482821927	169195.20604592218	189721.04321020425	148669.36888164008	249130.98817303017	282769.8941683866	215492.08217767373
2020-12-20	1105657	210209	200038.38542969342	215202.0471180643	184874.72374132255	186948.85158677207	209628.46394339006	164269.23923015408	275272.29182240885	312440.92674673646	238103.65689808127
2020-12-27	1212002	233317	219278.60377816926	235900.74635369575	202656.4612026428	204930.08412271703	229791.08128137083	180069.0869640632	301748.7052796149	342492.3173270717	261005.09323215816
2021-01-03	1324347	257083	239604.357977798	257767.2691392241	221441.4468163719	223925.8203515076	251091.27635246445	196760.36435055075	329718.9217434808	374239.2116309671	285198.6318559944
2021-01-10	1440738	278989	260662.1251863875	280421.2942718996	240902.95610087537	243605.67023717376	273158.5780082538	214052.7624660937	358696.4593681709	407129.44061244995	310263.47812389175
2021-01-17	1549493	301197	280338.36710174306	301589.069300073	259087.66490341318	261994.39508974503	293778.1224023683	230210.6677771218	385772.88369971863	437861.8585217485	333683.9088776887
2021-01-24	1643483	321934	297343.28621005325	319883.02520920837	274803.54721089813	277886.595438172	311598.2775915809	244174.9132847631	409173.30779904436	464421.9243513193	353924.6912467694
2021-01-31	1724090	339351	311926.9176023669	335572.15069029864	288281.6845144351	291515.9452997068	326881.0656470853	256150.82495232823	429241.80429201544	487200.1691254891	371283.43945854175
2021-02-07	1793177	352579	324426.32016046694	349019.0549555868	299833.58536534704	303197.4480709779	339979.70445501304	266415.1916869427	446442.1990121997	506723.0467504232	386161.35127397615
2021-02-14	1848797	366359	334489.2375006543	359844.77926313126	309133.6957381773	312601.89730365697	350525.05004096904	274678.7445663449	460289.752883936	522440.3662678264	398139.1395000456
2021-02-21	1895235	378240	342890.923143294	368883.34426481684	316898.50202177116	320453.8177183846	359329.52250268473	281578.11293408455	471851.2902211473	535562.9999202746	408139.58052202
2021-02-28	1936965	387804	350440.82498806244	377005.55705435	323876.09292177483	327509.690902126	367241.3756364845	287778.0061677676	482240.6901324662	547355.228317636	417126.15194729646
