# Supplementary material for: Convalescent plasma use in the USA was inversely correlated with COVID-19 mortality
Source: eLife. 2021 Jun 4;10:e69866. doi: 10.7554/eLife.69866 (PMC8205484; doi:10.7554/eLife.69866)
Supplement: Figure 4—source data 1. [file elife-69866-fig4-data1.csv]

Est. Deaths (95% CI)	Est. Deaths / 1k Hosp. (95% CI)
452,561 (371,151 to 533,970)	252 (207 to 298)
356,534 (340,366 to 372,702)	199 (190 to 208)
327,516 (293,811 to 361,221)	183 (164 to 201)
294,151 (232,940 to 355,363)	164 (130 to 198)
