# Supplementary material for: Convalescent plasma use in the USA was inversely correlated with COVID-19 mortality
Source: eLife. 2021 Jun 4;10:e69866. doi: 10.7554/eLife.69866 (PMC8205484; doi:10.7554/eLife.69866)
Supplement: Figure 4—source data 2. [file elife-69866-fig4-data2.csv]

xdate	ci_low	ci_high	estimate	group
2020-08-03	4388.443247361182	5927.100905995142	5157.772076678162	50% plasma usage
2020-08-10	8562.822899535007	11565.08413233509	10063.953515935049	50% plasma usage
2020-08-17	12587.469671893945	17000.83576136733	14794.152716630637	50% plasma usage
2020-08-24	16541.506157965527	22341.22002018736	19441.363089076443	50% plasma usage
2020-08-31	20148.770783515214	27213.24871581107	23681.009749663142	50% plasma usage
2020-09-07	23558.15915223591	31818.022607164203	27688.090879700056	50% plasma usage
2020-09-14	26739.11068567518	36114.26609330511	31426.688389490144	50% plasma usage
2020-09-21	30067.422816583712	40609.5371346715	35338.479975627604	50% plasma usage
2020-09-28	33746.55364260373	45578.62945808036	39662.59155034205	50% plasma usage
2020-10-05	38239.65640521297	51647.08516182087	44943.37078351692	50% plasma usage
2020-10-12	43192.56330481201	58336.5596103227	50764.56145756735	50% plasma usage
2020-10-19	48717.88797980775	65799.15056595986	57258.51927288381	50% plasma usage
2020-10-26	55006.80847805331	74293.06612594724	64649.937302000275	50% plasma usage
2020-11-02	62661.605423296176	84631.75603304351	73646.68072816984	50% plasma usage
2020-11-09	72324.19050905776	97682.19638008694	85003.19344457235	50% plasma usage
2020-11-16	83492.89579224905	112766.82650321805	98129.86114773355	50% plasma usage
2020-11-23	95345.51612108131	128775.16311134923	112060.33961621526	50% plasma usage
2020-11-30	108297.20090603849	146267.91356887043	127282.55723745446	50% plasma usage
2020-12-07	122206.8691205662	165054.53160842092	143630.70036449356	50% plasma usage
2020-12-14	136525.12808262234	184392.99877836934	160459.06343049585	50% plasma usage
2020-12-21	151026.8900614134	203979.30802703128	177503.09904422236	50% plasma usage
2020-12-28	166372.0681870835	224704.74847245726	195538.40832977038	50% plasma usage
2021-01-04	182319.2478444604	246243.26171451458	214281.2547794875	50% plasma usage
2021-01-11	197171.6889723426	266303.20377215534	231737.446372249	50% plasma usage
2021-01-18	210063.36896855757	283714.91081230255	246889.13989043006	50% plasma usage
2021-01-25	221164.11533984778	298707.754553431	259935.9349466394	50% plasma usage
2021-02-01	230653.1051763179	311523.73440928076	271088.41979279934	50% plasma usage
2021-02-08	238233.38454670418	321761.7797003823	279997.58212354325	50% plasma usage
2021-02-15	244605.6140190872	330368.213679375	287486.9138492311	50% plasma usage
2021-02-22	250276.0665552269	338026.8166212191	294151.44158822304	50% plasma usage
2020-08-03	6789.909628625224	9080.862948480943	7935.386288553084	No plasma usage
2020-08-10	13248.614685566681	17718.771058403956	15483.69287198532	No plasma usage
2020-08-17	19475.64926961591	26046.84178777113	22761.245528693522	No plasma usage
2020-08-24	25593.433845013256	34228.80094718373	29911.117396098496	No plasma usage
2020-08-31	31174.68428701154	41693.196368775956	36433.94032789375	No plasma usage
2020-09-07	36449.775613854945	48748.13288484332	42598.95424934914	No plasma usage
2020-09-14	41371.4237308898	55330.37248388374	48350.898107386776	No plasma usage
2020-09-21	46521.071865980746	62217.540576742394	54369.30622136158	No plasma usage
2020-09-28	52213.51549860298	69830.64639067969	61022.08094464134	No plasma usage
2020-10-05	59165.35695823396	79128.077871702	69146.71741496798	No plasma usage
2020-10-12	66828.61892875022	89376.96710568934	78102.79301721978	No plasma usage
2020-10-19	75377.54006031393	100810.34183365623	88093.9409469851	No plasma usage
2020-10-26	85107.91583089562	113823.8005750449	99465.85820297027	No plasma usage
2020-11-02	96951.60995065639	129663.62304512001	113307.6164978882	No plasma usage
2020-11-09	111901.80431643152	149658.09624346858	130779.95027995006	No plasma usage
2020-11-16	129182.30568493344	172769.13500410903	150975.72034452125	No plasma usage
2020-11-23	147520.97759178095	197295.37693539643	172408.1772635887	No plasma usage
2020-11-30	167560.14963329688	224095.8772164115	195828.0134248542	No plasma usage
2020-12-07	189081.53770128547	252878.70146528847	220980.11958328699	No plasma usage
2020-12-14	211235.10763752053	282507.0092652069	246871.05845136373	No plasma usage
2020-12-21	233672.59805078566	312515.03389218124	273093.8159714835	No plasma usage
2020-12-28	257415.04311284915	344268.3121333955	300841.67762312235	No plasma usage
2021-01-04	282088.9200668577	377267.29257378774	329678.1063203227	No plasma usage
2021-01-11	305068.99006854615	408000.9661637973	356534.9781161717	No plasma usage
2021-01-18	325015.32119361876	434677.3004861553	379846.31083988707	No plasma usage
2021-01-25	342190.67482652096	457647.71407966554	399919.1944530933	No plasma usage
2021-02-01	356872.2782619346	477282.97227203887	417077.6252669867	No plasma usage
2021-02-08	368600.67691801925	492968.59794694453	430784.6374324819	No plasma usage
2021-02-15	378459.9504260815	506154.4452402361	442307.19783315883	No plasma usage
2021-02-22	387233.4170299732	517888.128333327	452560.7726816501	No plasma usage
2020-08-03	5318.83732146334	6166.762655197346	5742.799988330343	Maintenance of plasma usage
2020-08-10	10378.227414132329	12032.717185455977	11205.472299794154	Maintenance of plasma usage
2020-08-17	15256.13975158858	17688.262903420447	16472.201327504514	Maintenance of plasma usage
2020-08-24	20048.471712402104	23244.58508082495	21646.52839661353	Maintenance of plasma usage
2020-08-31	24420.512693063112	28313.613783345027	26367.06323820407	Maintenance of plasma usage
2020-09-07	28552.725661709523	33104.58125955278	30828.653460631154	Maintenance of plasma usage
2020-09-14	32408.070890110594	37574.54293359321	34991.306911851905	Maintenance of plasma usage
2020-09-21	36442.01864367909	42251.57982271532	39346.799233197205	Maintenance of plasma usage
2020-09-28	40901.16218159505	47421.596911378445	44161.37954648674	Maintenance of plasma usage
2020-10-05	46346.84788741025	53735.430031832664	50041.13895962146	Maintenance of plasma usage
2020-10-12	52349.820828478	60695.39272964872	56522.60677906336	Maintenance of plasma usage
2020-10-19	59046.56986636088	68459.73282544302	63753.15134590195	Maintenance of plasma usage
2020-10-26	66668.80471647499	77297.09903575142	71982.9518761132	Maintenance of plasma usage
2020-11-02	75946.49554797051	88053.83286463881	82000.16420630466	Maintenance of plasma usage
2020-11-09	87657.64578487226	101631.96649901396	94644.8061419431	Maintenance of plasma usage
2020-11-16	101194.22883818693	117326.5421754123	109260.38550679962	Maintenance of plasma usage
2020-11-23	115559.72380044627	133982.17431877585	124770.94905961106	Maintenance of plasma usage
2020-11-30	131257.29592957936	152182.2424412902	141719.76918543476	Maintenance of plasma usage
2020-12-07	148115.95360347984	171728.4955557891	159922.22457963447	Maintenance of plasma usage
2020-12-14	165469.82736989003	191848.9117666508	178659.3695682704	Maintenance of plasma usage
2020-12-21	183046.10863686382	212227.1915265962	197636.65008173	Maintenance of plasma usage
2020-12-28	201644.61875053452	233790.6631425583	217717.64094654642	Maintenance of plasma usage
2021-01-04	220972.76077099718	256200.08407467793	238586.42242283755	Maintenance of plasma usage
2021-01-11	238974.06869113928	277071.1479402107	258022.60831567497	Maintenance of plasma usage
2021-01-18	254598.91441324394	295186.8956626444	274892.9050379442	Maintenance of plasma usage
2021-01-25	268053.13058231946	310785.97358360264	289419.5520829611	Maintenance of plasma usage
2021-02-01	279553.8816323763	324120.16633960506	301837.0239859907	Maintenance of plasma usage
2021-02-08	288741.2564142133	334772.18599722954	311756.72120572143	Maintenance of plasma usage
2021-02-15	296464.46257827146	343726.6202978824	320095.54143807694	Maintenance of plasma usage
2021-02-22	303337.1080424556	351694.89810549957	327516.0030739776	Maintenance of plasma usage
2020-08-03	NA	NA	6854	Observed deaths
2020-08-10	NA	NA	13249	Observed deaths
2020-08-17	NA	NA	19143	Observed deaths
2020-08-24	NA	NA	24297	Observed deaths
2020-08-31	NA	NA	29613	Observed deaths
2020-09-07	NA	NA	34914	Observed deaths
2020-09-14	NA	NA	39768	Observed deaths
2020-09-21	NA	NA	44673	Observed deaths
2020-09-28	NA	NA	49568	Observed deaths
2020-10-05	NA	NA	55160	Observed deaths
2020-10-12	NA	NA	60935	Observed deaths
2020-10-19	NA	NA	67586	Observed deaths
2020-10-26	NA	NA	76068	Observed deaths
2020-11-02	NA	NA	86515	Observed deaths
2020-11-09	NA	NA	96673	Observed deaths
2020-11-16	NA	NA	111850	Observed deaths
2020-11-23	NA	NA	128881	Observed deaths
2020-11-30	NA	NA	147515	Observed deaths
2020-12-07	NA	NA	163041	Observed deaths
2020-12-14	NA	NA	181466	Observed deaths
2020-12-21	NA	NA	204071	Observed deaths
2020-12-28	NA	NA	227405	Observed deaths
2021-01-04	NA	NA	249116	Observed deaths
2021-01-11	NA	NA	271094	Observed deaths
2021-01-18	NA	NA	291445	Observed deaths
2021-01-25	NA	NA	309436	Observed deaths
2021-02-01	NA	NA	322891	Observed deaths
2021-02-08	NA	NA	336444	Observed deaths
2021-02-15	NA	NA	348382	Observed deaths
2021-02-22	NA	NA	356534	Observed deaths
