# Supplementary material for: Convalescent plasma use in the USA was inversely correlated with COVID-19 mortality
Source: eLife. 2021 Jun 4;10:e69866. doi: 10.7554/eLife.69866 (PMC8205484; doi:10.7554/eLife.69866)
Supplement: Figure 4—source data 3. [file elife-69866-fig4-data3.csv]

x	y	label	fill	color
1	1	-88 (-166 to -11)	-158409	black
2	1	-35 (-65 to -4)	-62383	white
3	1	-19 (-35 to -2)	-33365	white
4	1		NA	NA
1	2	-70 (-131 to -8)	-125045	black
2	2	-16 (-30 to -2)	-29018	white
3	2		NA	NA
4	2	-33,365 (-62,665 to -4,064)	-33365	white
1	3	-54 (-101 to -7)	-96027	white
2	3		NA	NA
3	3	-29,018 (-54,501 to -3,535)	-29018	white
4	3	-62,383 (-117,166 to -7,599)	-62383	white
1	4		NA	NA
2	4	-96,027 (-180,356 to -11,697)	-96027	white
3	4	-125,045 (-234,858 to -15,232)	-125045	black
4	4	-158,409 (-297,523 to -19,296)	-158409	black
