# Supplementary material for: Convalescent plasma use in the USA was inversely correlated with COVID-19 mortality
Source: eLife. 2021 Jun 4;10:e69866. doi: 10.7554/eLife.69866 (PMC8205484; doi:10.7554/eLife.69866)
Supplement: Source data 1. — Summarized data of hospitalizations and deaths, from CDC data. [file elife-69866-data1.xlsx]

## Sheet: cdc_analysis
hospitaldate	deathdt	shift	totalhospitalizations	totaldistributions	totaldeaths	dists_per_admin	cfr
2020-08-03T00:00:00Z	2020-08-17	14 days	31448	10511	6854	0.334234	0.217947
2020-08-10T00:00:00Z	2020-08-24	14 days	29914	10495	6395	0.350839	0.21378
2020-08-17T00:00:00Z	2020-08-31	14 days	28841	9218	5894	0.319614	0.204362
2020-08-24T00:00:00Z	2020-09-07	14 days	28335	8968	5154	0.316499	0.181895
2020-08-31T00:00:00Z	2020-09-14	14 days	25850	8424	5316	0.32588	0.205648
2020-09-07T00:00:00Z	2020-09-21	14 days	24432	7894	5301	0.323101	0.21697
2020-09-14T00:00:00Z	2020-09-28	14 days	22795	9647	4854	0.423207	0.212941
2020-09-21T00:00:00Z	2020-10-05	14 days	23851	11670	4905	0.489288	0.205652
2020-09-28T00:00:00Z	2020-10-12	14 days	26365	11101	4895	0.421051	0.185663
2020-10-05T00:00:00Z	2020-10-19	14 days	32198	14796	5592	0.459532	0.173675
2020-10-12T00:00:00Z	2020-10-26	14 days	35493	16401	5775	0.462091	0.162708
2020-10-19T00:00:00Z	2020-11-02	14 days	39595	17827	6651	0.450234	0.167976
2020-10-26T00:00:00Z	2020-11-09	14 days	45067	18628	8482	0.41334	0.188209
2020-11-02T00:00:00Z	2020-11-16	14 days	54855	19205	10447	0.350105	0.190448
2020-11-09T00:00:00Z	2020-11-23	14 days	69243	26176	10158	0.378031	0.146701
2020-11-16T00:00:00Z	2020-11-30	14 days	80036	28076	15177	0.350792	0.189627
2020-11-23T00:00:00Z	2020-12-07	14 days	84937	28688	17031	0.337756	0.200513
2020-11-30T00:00:00Z	2020-12-14	14 days	92813	27350	18634	0.294679	0.200769
2020-12-07T00:00:00Z	2020-12-21	14 days	99678	25706	15526	0.25789	0.155762
2020-12-14T00:00:00Z	2020-12-28	14 days	102606	29842	18425	0.290841	0.17957
2020-12-21T00:00:00Z	2021-01-04	14 days	103921	24350	22605	0.234313	0.217521
2020-12-28T00:00:00Z	2021-01-11	14 days	109965	25475	23334	0.231665	0.212195
2021-01-04T00:00:00Z	2021-01-18	14 days	114279	30576	21711	0.267556	0.189982
2021-01-11T00:00:00Z	2021-01-25	14 days	106434	28946	21978	0.271962	0.206494
2021-01-18T00:00:00Z	2021-02-01	14 days	92383	25395	20351	0.274888	0.220289
2021-01-25T00:00:00Z	2021-02-08	14 days	79549	20226	17991	0.254258	0.226162
2021-02-01T00:00:00Z	2021-02-15	14 days	67999	18913	13455	0.278136	0.197871
2021-02-08T00:00:00Z	2021-02-22	14 days	54321	12303	13553	0.226487	0.249498
2021-02-15T00:00:00Z	2021-03-01	14 days	45664	8369	11938	0.183273	0.261431
2021-02-22T00:00:00Z	2021-03-08	14 days	40635	8429	8152	0.207432	0.200615
