# Supplementary material for: Convalescent plasma use in the USA was inversely correlated with COVID-19 mortality
Source: eLife. 2021 Jun 4;10:e69866. doi: 10.7554/eLife.69866 (PMC8205484; doi:10.7554/eLife.69866)
Supplement: Source data 2. [file elife-69866-data2.xlsx]

## Sheet: Sheet1
	Total Industry Distributions
3/22-3/29	7
3/30-4/5	63
4/6-4/12	422
4/13-4/19	1405
4/20-4/26	4133
4/27-5/3	4994
5/4-5/10	4964
5/11-5/17	4416
5/18-5/24	3942
5/25-5/31	3729
6/1-6/7	3285
6/8-6/14	3200
6/15-6/21	4242
6/22-6/28	5649
6/29-7/5	6638
7/6-7/12	7316
7/13-7/19	11231
7/20-7/26	12919
7/27-8/2	11724
8/3-8/9	10511
8/10-8/16	10495
8/17-8/23	9218
8/24-8/30	8968
8/31-9/6	8424
9/7-9/13	7894
9/14-9/20	9647
9/21-9/27	11670
9/28-10/4	11101
10/5-10/11	14796
10/12-10/18	16401
10/19-10/25	17827
10/26-11/1	18628
11/2-11/8	19205
11/9-11/15	26176
11/16-11/22	28076
11/23-11/29	28688
11/30- 12/6	27350
12/7-12/13	25706
12/14-12/20	29842
12/21-12/27	24350
12/28-1/3	25475
1/4 - 1/10	30576
1/11-1/17	28946
1/18-1/24	25395
1/25-1/31	20226
2/1-2/7	18913
2/8-2/14	12303
2/15-2/21	8369
2/22-2/28	8429
3/1-3/7	6006
3/8-3/14	3905
